# Supplementary material for: Hierarchically Assembled Plasmonic Metal-Dielectric-Metal Hybrid Nano-Architectures for High-Sensitivity SERS Detection
Source: MDPI journal article supplement (doi:10.3390/nano12030401), 2022-01-26
Supplement: s1 [file s1]

*Supplementary Material*

# **Hierarchically Assembled Plasmonic Metal-Dielectric-Metal Hybrid Nano-Architectures for High-Sensitivity SERS Detection**

**Puran Pandey<sup>1</sup>, Min-Kyu Seo<sup>1</sup>, Ki Hoon Shin<sup>1</sup>, Young-Woo Lee<sup>2,\*</sup> and Jung Inn Sohn<sup>1,\*</sup>**

<sup>1</sup> Division of Physics and Semiconductor Science, Dongguk University-Seoul, Seoul 04620 Republic of Korea; ppcpurans@gmail.com (P.P.); seominkyuu@gmail.com (M.-K.S.); kihoonshin@dongguk.edu (K.H.S.)

<sup>2</sup> Department of Energy Systems, Soonchunhyang University, Asan-si, Chungcheongnam-do 31538, Republic of Korea

\* Correspondence: ywlee@sch.ac.kr (Y.-W.L.); junginn.sohn@dongguk.edu (J.I.S.)

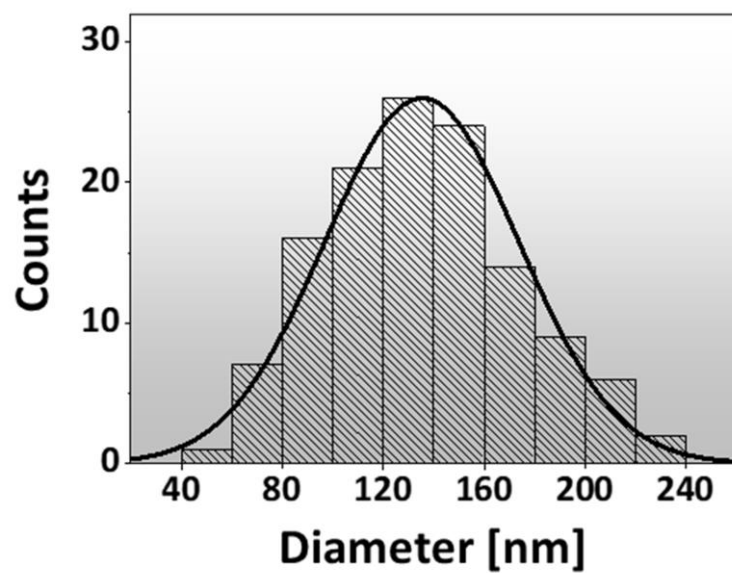

**Figure S1.** Histogram of Au NPs arrays on Si/SiO<sub>2</sub> substrate by the annealing of 10 nm Au at 800 °C for 120 s.

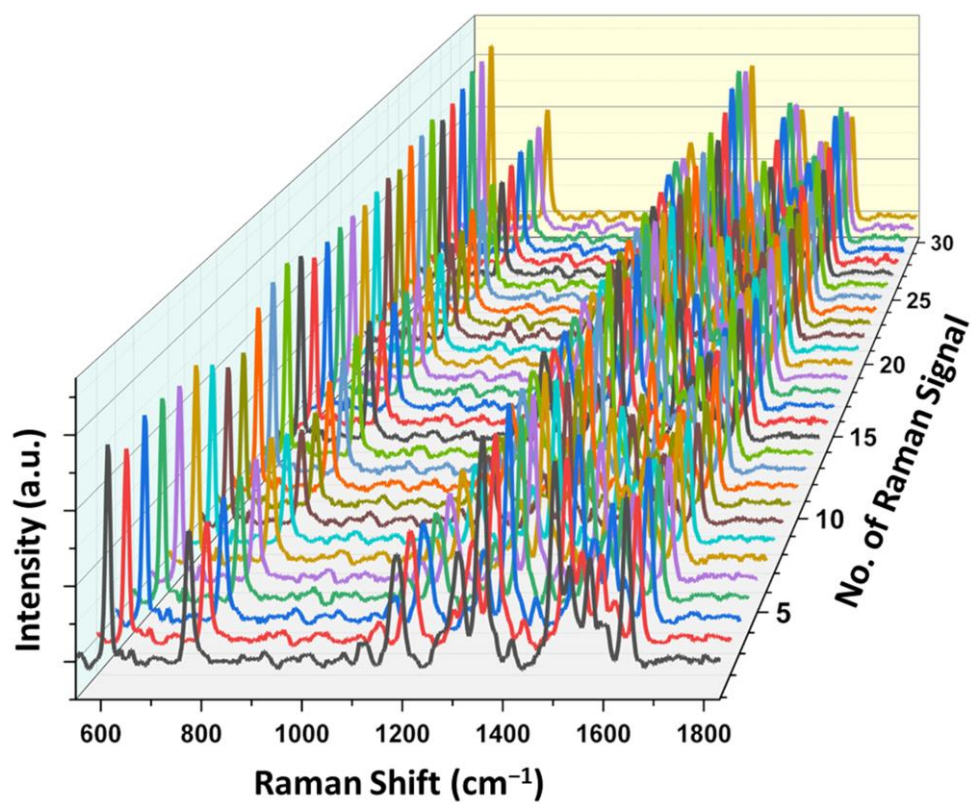

**Figure S2.** Raman spectra of R6G molecules (10<sup>-6</sup> M) measured at 30 different locations on PMDM hybrid nanostructures to test the SERS reproducibility.

**Table S1.** Raman Band Assignments of R6G molecules.

| Raman peak [cm <sup>-1</sup> ] |                         | Assignment                                                                    |
|--------------------------------|-------------------------|-------------------------------------------------------------------------------|
| This work                      | Literature<br>Ref. [45] |                                                                               |
| 612                            | 612                     | C–C ring in-plane bending in xanthene/phenyl rings                            |
| 776                            | 772                     | C–H out-of-plane bending                                                      |
| 1128                           | 1127                    | C–H in-plane bending in xanthene/phenyl rings                                 |
| 1185                           | 1187                    | C–H in-plane bending in xanthene ring                                         |
| 1310                           | 1312                    | hybrid mode (xanthene/phenyl rings and NHC <sub>2</sub> H <sub>5</sub> group) |
| 1363                           | 1363                    | C–C stretching in xanthene ring                                               |
| 1506                           | 1509                    | C–C stretching in xanthene ring                                               |
| 1575                           | 1575                    | C–C stretching in phenyl ring                                                 |
| 1650                           | 1651                    | C–C stretching in xanthene ring                                               |

**Table S2.** Comparison of SERS performance of current work and previously reported plasmonic NPs-based SERS substrates.

| SERS material                                         | Probe Molecule | LOD                     | EF                 | Reference   |
|-------------------------------------------------------|----------------|-------------------------|--------------------|-------------|
| Au island over Nanosphere                             | R6G            | -                       | $1.5 \times 10^6$  | [46]        |
| Nanoporous Au-Ag nanorod                              | 4-MBA          | $10^{-9}$ M             | $1.5 \times 10^6$  | [47]        |
| Nanoporous Au thin films                              | R6G            | $10^{-8}$ M             | -                  | [48]        |
| Au@AuAg multishell Nanostructures                     | 4-ABT          | $10^{-5}$ M             | $9.18 \times 10^5$ | [49]        |
| Porous AuAg NPs                                       | R6G            | $2.37 \times 10^{-9}$ M | $7.8 \times 10^6$  | [4]         |
| Ag@ZrO <sub>2</sub>                                   | R6G            | $10^{-8}$ M             | -                  | [50]        |
| Sandwich-Like Sensor (AuA-pMIP)                       | R6G            | $10^{-10}$ M            | $1.24 \times 10^6$ | [51]        |
| Au/SiO <sub>2</sub> /Graphene/Au                      | CV             | -                       | $0.23 \times 10^6$ | [29]        |
| Ag@SiO <sub>2</sub>                                   | R6G            | -                       | $1.07 \times 10^7$ | [52]        |
| Ag/Al <sub>2</sub> O <sub>3</sub> /Au Nanograting     | p-thiocresol   | $10^{-9}$ M             | $5.2 \times 10^7$  | [53]        |
| Ag-Al <sub>2</sub> O <sub>3</sub> -Ag heterojunctions | MB             | $10^{-10}$ M            | $1 \times 10^8$    | [30]        |
| PMDM hybrid nanostructure                             | R6G            | $10^{-11}$ M            | $1.3 \times 10^8$  | [This work] |

LOD = Limit of Detection

EF = Enhancement Factor

CV = Crystal violet

MB = methylene blue

R6G = Rhodamine 6G

4-MBA = 4-Mercaptobenzoic acid

4-ABT = 4-Aminobenzenethiol
